# Supplementary material for: Vascularized Co-Culture Clusteroids of Primary Endothelial and Hep-G2 Cells Based on Aqueous Two-Phase Pickering Emulsions
Source: MDPI journal article supplement (doi:10.3390/bioengineering9030126), 2022-03-21
Supplement: s1 [file s1]

# Vascularized Co-Culture Clusteroids of Primary Endothelial and Hep-G2 Cells Based on Aqueous Two-Phase Pickering Emulsions

Anheng Wang <sup>1</sup>, Leigh A. Madden <sup>2</sup> and Vesselin N. Paunov <sup>3,\*</sup>

<sup>1</sup> Department of Chemistry, University of Hull, Hull HU67RX, UK; a.wang-2019@hull.ac.uk

<sup>2</sup> Department of Biomedical Sciences, University of Hull, Hull HU67RX, UK; l.a.madden@hull.ac.uk

<sup>3</sup> Department of Chemistry, Nazarbayev University, Kabanbay Batyr Avenue 53, Nur-Sultan 010000, Kazakhstan

\* Correspondence: vesselin.paunov@nu.edu.kz

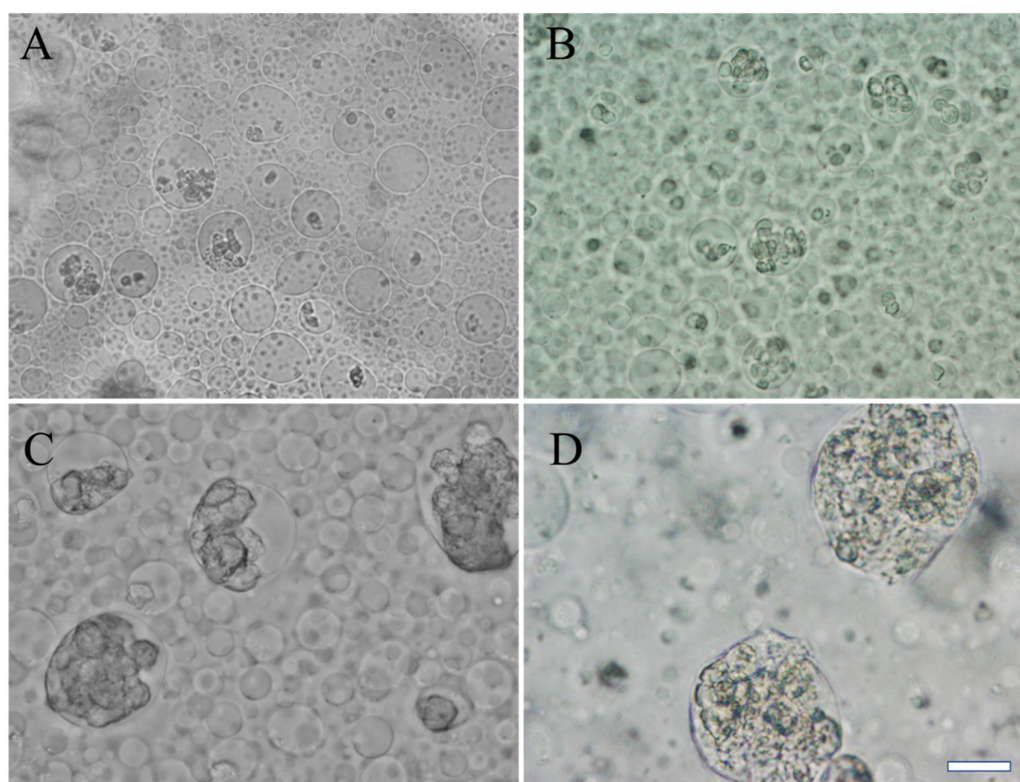

**Figure S1.** Different cell concentration of mixed HUVEC and Hep-G2 cells in 5.5 wt% DEX/5.5 wt% PEO w/w Pickering emulsion with different cell cocentration before shrinking: (A)  $1 \times 10^3 \text{ mL}^{-1}$ ; (B)  $1 \times 10^4 \text{ mL}^{-1}$ ; (C)  $1 \times 10^5 \text{ mL}^{-1}$ ; and (D)  $1 \times 10^6 \text{ mL}^{-1}$ . The bar is 100  $\mu\text{m}$  for A,B and 50  $\mu\text{m}$  for C,D.

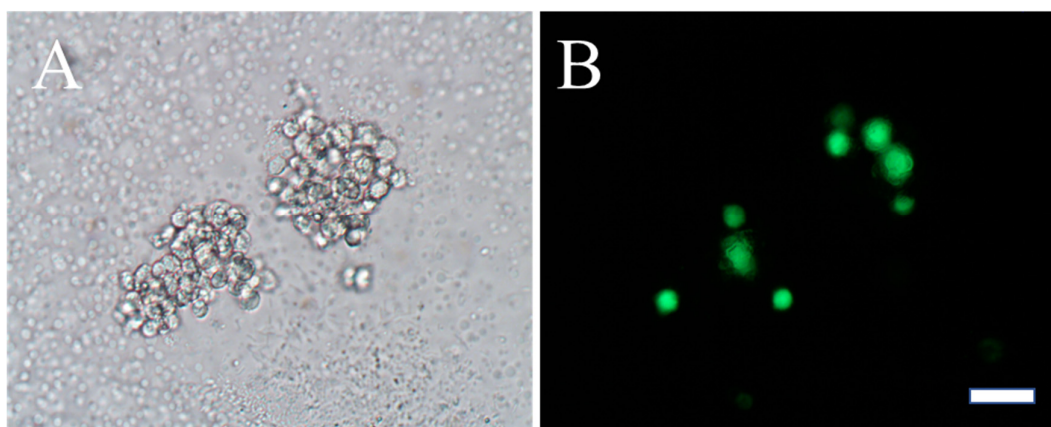

**Figure S2.** Bright-field observation (A) and fluorescence microscopy observation (B) of the freshly collected Hep-g2 and HUVEC co-culture clusteroids at a cell ratio of 5:1. The bar is 100  $\mu$ m.

| MIXED                | HUVEC                | HEP         |
|----------------------|----------------------|-------------|
| 1 Angiogenin         | 1 Angiogenin         | 1 IGFBP-1   |
| 2 Angiopoietin-2     | 2 Angiopoietin-2     | 2 MMP-9     |
| 3 HB-EGF             | 3 HB-EGF             | 3 Serpin E1 |
| 4 IGFBP-1            | 4 IGFBP-1            | 4 Serpin F1 |
| 5 IGFBP-3            | 5 MMP-9              | 5 TIMP-1    |
| 6 MMP-9              | 6 Pentraxin 3 (PTX3) | 6 uPA       |
| 7 Pentraxin 3 (PTX3) | 7 Serpin E1          | 7 VEGF      |
| 8 Serpin E1          | 8 TIMP-1             |             |
| 9 Serpin F1          | 9 Thrombospondin-1   |             |
| 10 TIMP-1            | 10 uPA               |             |
| 11 TIMP-4            |                      |             |
| 12 Thrombospondin-1  |                      |             |
| 13 uPA               |                      |             |
| 14 VEGF              |                      |             |

**Figure S3.** Angiogenesis-related protein production in the three types of clusteroids (HUVEC, Hep-G2, and mixed Hep-G2 and HUVEC) corresponding to Figure 4A.

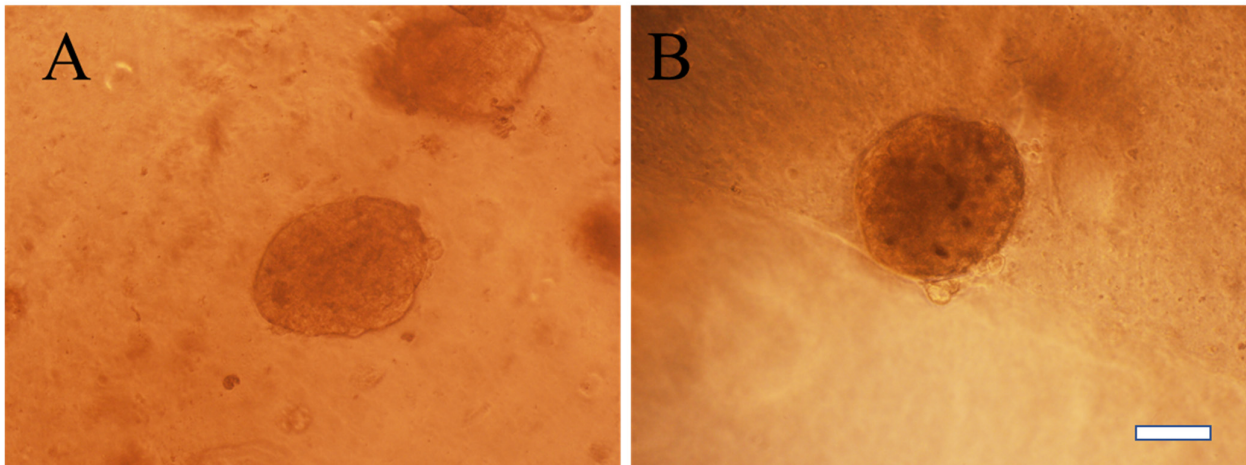

**Figure S4.** Bright-field observation of the individual Hep-G2: HUVEC clusteroids in 5 mg mL<sup>-1</sup> Matrigel after 21 days of culture in low-serum medium. The bar is 50  $\mu$ m.

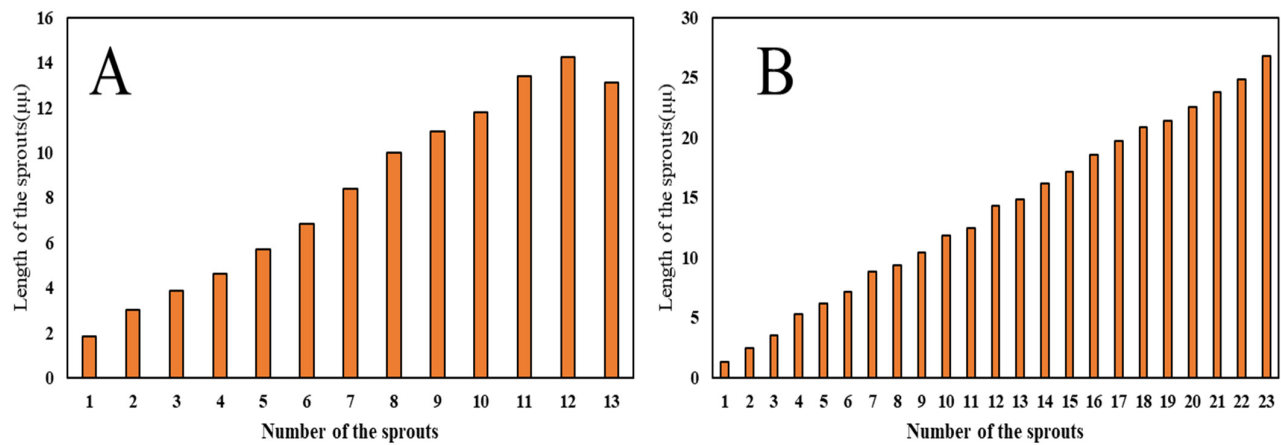

**Figure S5.** The length of the sprouts in Table S1.

**Table S1.** The effect of the angiogenesis-related genes on the vascularization process. (+) represents that they are pro-angiogenesis.

| (+) | Angiogenin         |
|-----|--------------------|
| (+) | angiopoietin-2     |
| (+) | HB-EGF             |
| (+) | IGFBP-1            |
| (+) | IGFBP-3            |
| (+) | MMP-9              |
| (+) | Pentraxin 3 (PTX3) |
| (-) | Serpin E1          |
| (-) | Serpin F1          |
| (-) | TIMP-1             |
| (-) | TIMP-4             |
| (+) | Thrombospondin-1   |
| (+) | uPA                |
| (+) | VEGF               |
